# Supplementary material for: Challenging existing Raven's norms based on children attending government schools in India
Source: Research Square preprint supplement (doi:10.21203/rs.3.rs-8902845/v1), 2026-02-22
Supplement: Supplementary file 1 [file 1ad1534c440d57b73e293a59.pdf]

## Supplementary materials

### Challenging existing Raven's norms based on children attending government schools in India

For submission to the Journal of Cultural Cognitive Science

**Margreet Vogelzang<sup>1,2,\*</sup>, Mandy Wigdorowitz<sup>1,3,4\*</sup>, Ianthi M. Tsimpli<sup>1\*\*</sup>**

1 Theoretical and Applied Linguistics, University of Cambridge, English Faculty Building, 9 West Road, Cambridge, CB3 9DA, UK

2 School of Psychology, Newcastle University, Dame Margaret Barbour Building Wallace St, Richardson Rd, Newcastle upon Tyne NE2 4DR, UK

3 Modern Languages and Classics, University of Alabama, 200-C B.B. Comer Hall, Tuscaloosa, AL, 35487, USA

4 Department of Psychology, University of Johannesburg, Umthombo Building, 1 Jan Smuts Avenue, Braamfontein, 2001, Johannesburg, South Africa

\* Shared first authors

\*\* Corresponding author: [margreet.vogelzang@ncl.ac.uk](mailto:margreet.vogelzang@ncl.ac.uk)

**Table S1.** New Raven's CPM norms table for 8-to-11-year-old children attending government schools in India, adjusted to ensure a logical progression with age. Cells in age categories which were adjusted compared to Table 4 are in bold. Users might choose to use this table instead of the purely data-driven Table 4 to standardize their data.

| <b>Standard score</b> | <b>Percentile rank</b> | <b>Age 8</b> | <b>Age 9</b> | <b>Age 10</b> | <b>Age 11</b> |
|-----------------------|------------------------|--------------|--------------|---------------|---------------|
| <60                   | <b>0.1</b>             | <b>0-4</b>   | 0-4          | 0-4           | <b>0-5</b>    |
| <b>60</b>             | <b>0.4</b>             | <b>5</b>     | 5            | 5             | -             |
| <b>65</b>             | <b>1</b>               | <b>6</b>     | <b>6</b>     | 6             | 6             |
| <b>70</b>             | <b>2.3</b>             | <b>7-8</b>   | <b>7-8</b>   | 7             | 7             |
| <b>75</b>             | <b>5</b>               | 9            | 9            | 8-9           | 8-9           |
| <b>80</b>             | <b>9</b>               | 10           | <b>10</b>    | 10            | 10-11         |
| <b>85</b>             | <b>16</b>              | 11           | <b>11-12</b> | 11-12         | 12            |
| <b>90</b>             | <b>25</b>              | 12-13        | 13-14        | 13-14         | 13-14         |
| <b>95</b>             | <b>37</b>              | 14-15        | 15-16        | 15-16         | 15-17         |
| <b>100</b>            | <b>50</b>              | 16-17        | 17-18        | 17-18         | 18-20         |
| <b>105</b>            | <b>63</b>              | 18-20        | 19-20        | 19-20         | 21-23         |
| <b>110</b>            | <b>75</b>              | 21           | 21-23        | 21-23         | 24-25         |
| <b>115</b>            | <b>84</b>              | 22-24        | 24-25        | 24-25         | 26-27         |
| <b>120</b>            | <b>91</b>              | 25-26        | 26-27        | 26-27         | 28-30         |
| <b>125</b>            | <b>95</b>              | 27-28        | <b>28-29</b> | 28-29         | 31            |
| <b>130</b>            | <b>97.7</b>            | <b>29-31</b> | <b>30-31</b> | 30-31         | 32            |
| <b>135</b>            | <b>99</b>              | <b>32</b>    | 32           | 32-33         | 33            |
| <b>140</b>            | <b>99.6</b>            | <b>33-34</b> | 33-34        | 34            | 34-36         |
| <b>&gt;140</b>        | <b>99.9</b>            | 35-36        | 35-36        | 35-36         | -             |
